# Supplementary material for: First definitive spectroscopic evidence for a stable intermediate in a sulfinyl-transfer reaction: reaction of dibenzo[1,2]oxathiin-6-oxide with sodium ethoxide in anhydrous ethanol
Source: Royal Society of Chemistry journal article supplement (doi:10.1039/b006439o), 2000-01-01
Supplement: b006439o.doc [file b006439o.doc]

Electronic Supplementary Information (ESI) service

First definitive spectroscopic evidence for a stable intermediate in a sulfinyl-transfer reaction : Reaction of dibenzo[1,2]oxathiin-6-oxide with sodium ethoxide in anhydrous ethanol

Ik-Hwan Um,* Myung-Jin Kim, and Hye-Won Lee

Department of Chemistry, Ewha Womans University, Seoul 120-750, Korea

Tel: 822) 3277-2349, Fax: 822) 3277-2844, E-mail: ihum@mm.ewha.ac.kr

Figure S1. A plot of 1/*k*obs versus 1/[EtONa] for the reaction of **1** with EtONa (**1 2 →3**) in anhydrous ethanol at 25.0±0.1oC.


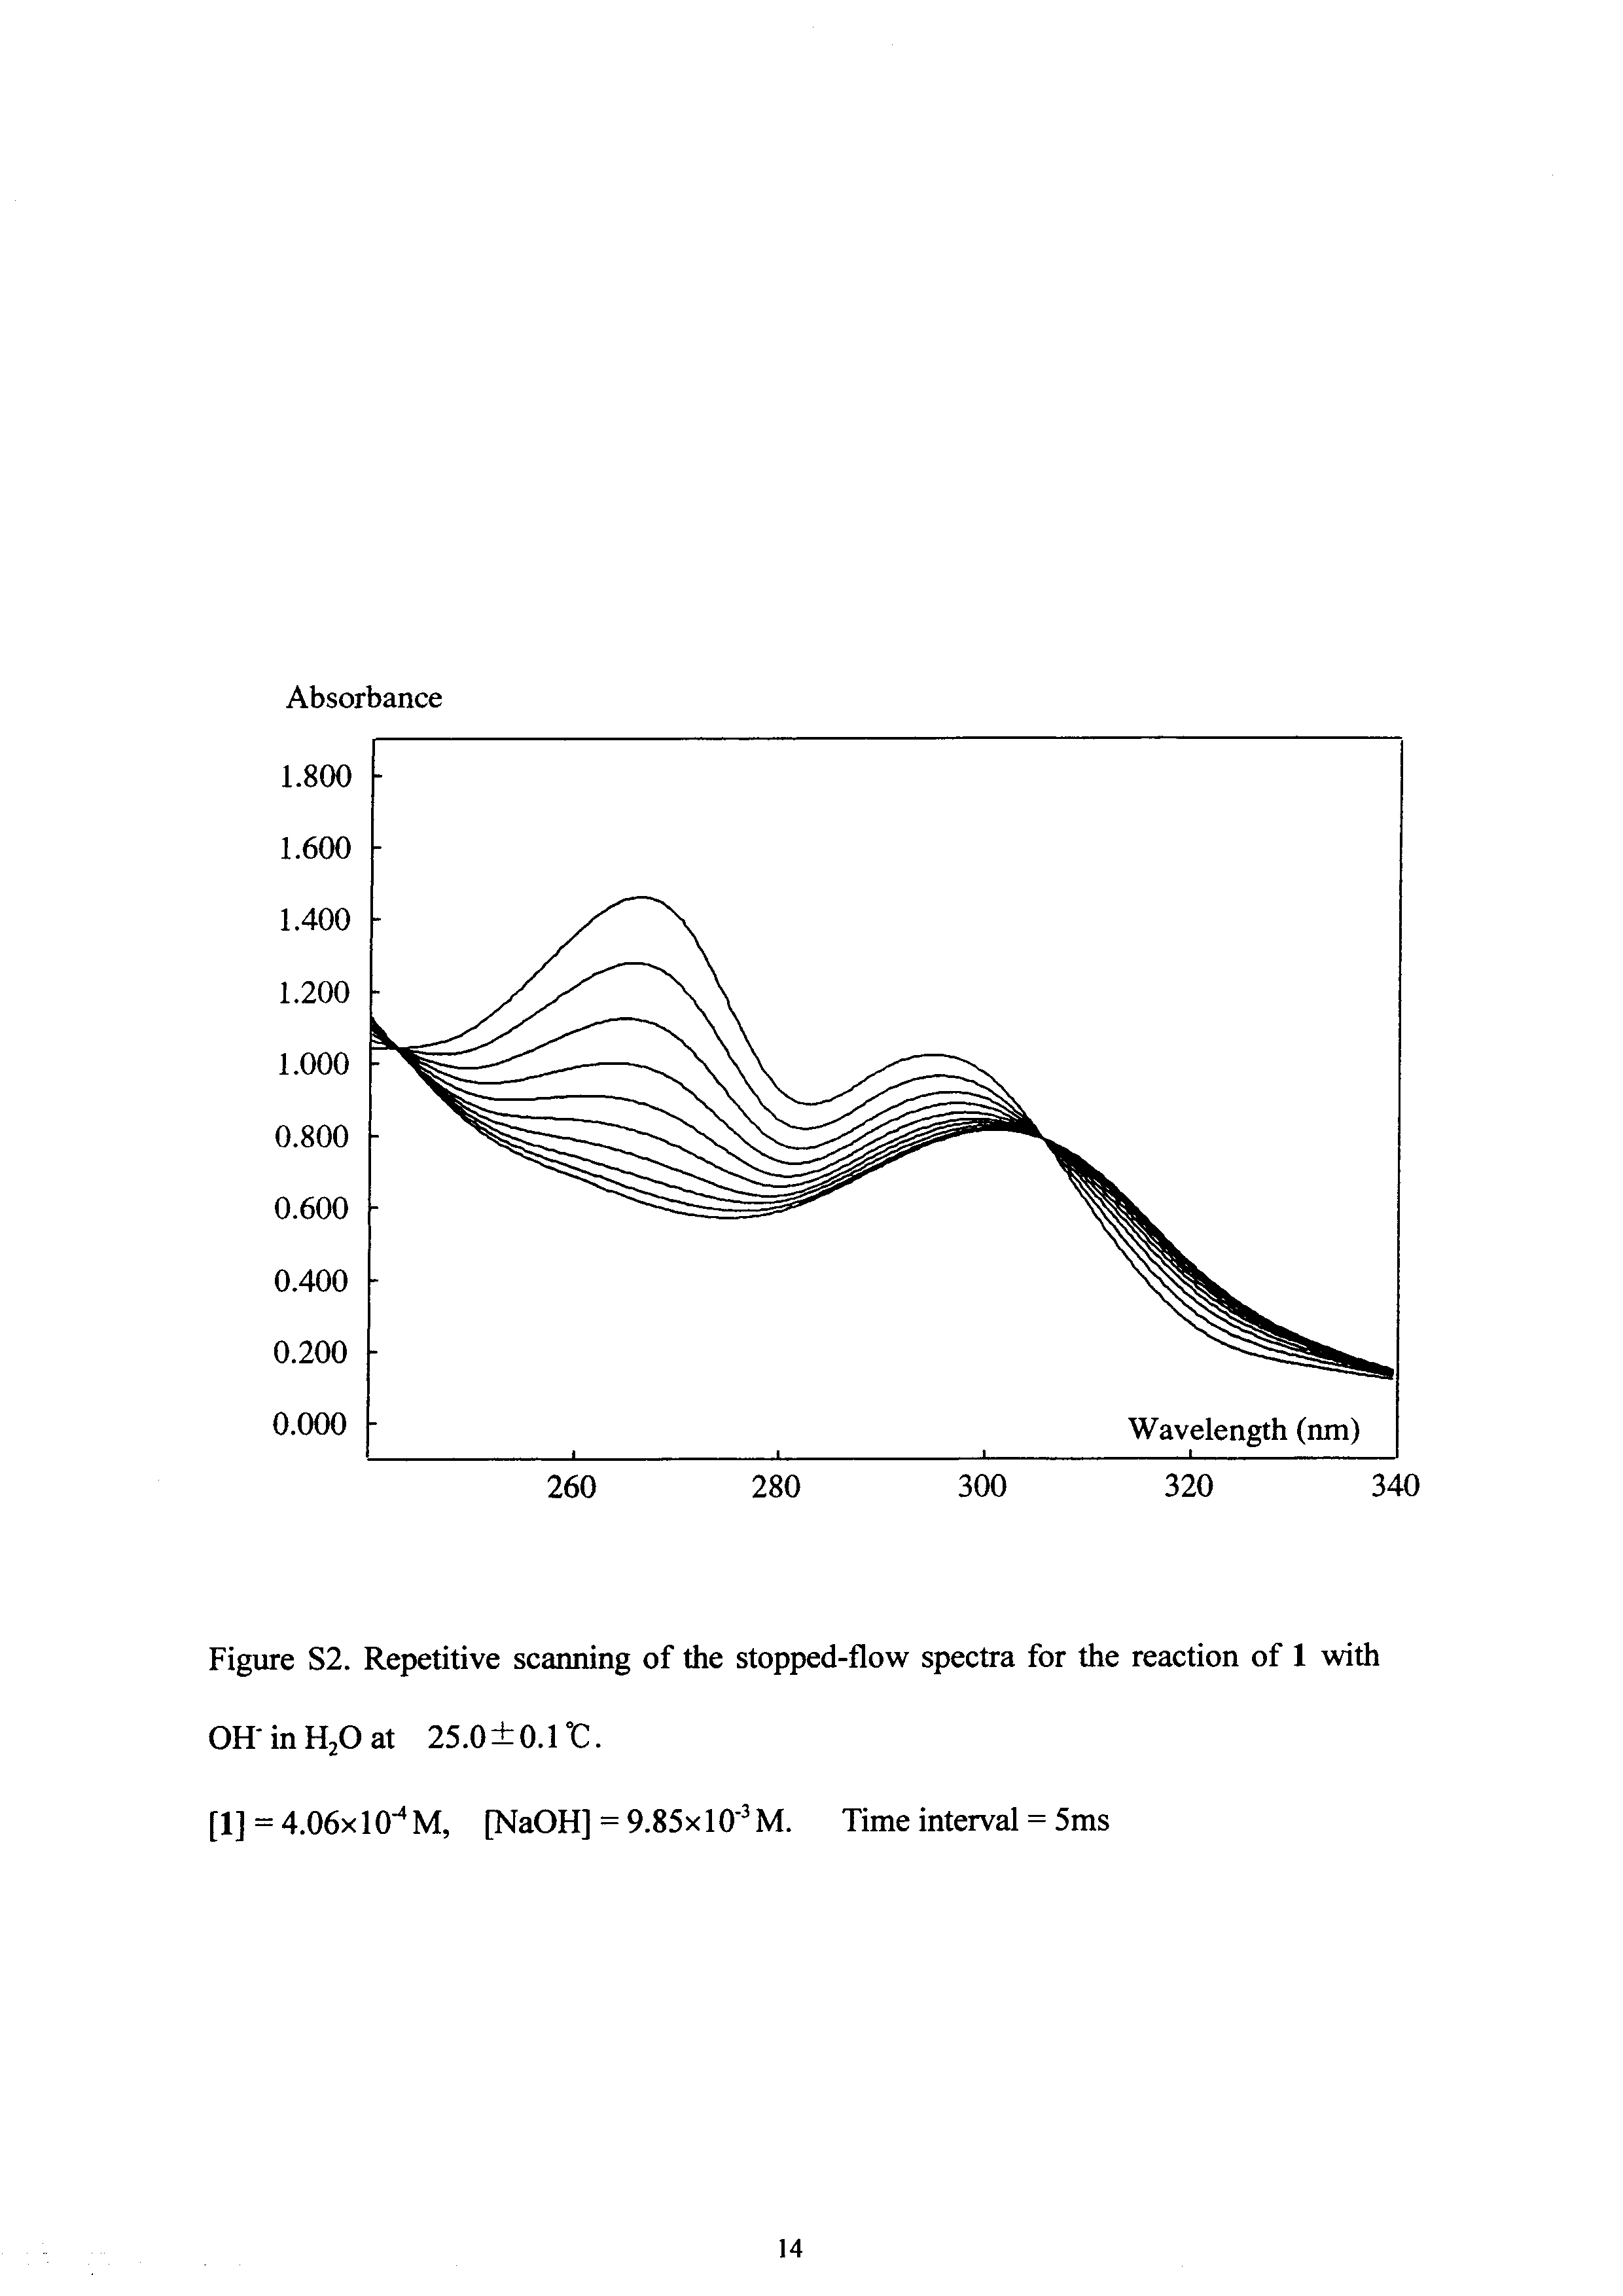


Table S1. Summary of kinetic results for the fast process of the reaction of **1** with EtONa (**1** ↔ **2**)in anhydrous ethanol at 25.0±0.1˚C.[a]

| [EtONa] ,10-3 M | *K*obs , s-1 |
| --- | --- |
| 1.63 | 52.5 |
| 3.26 | 80.1 |
| 4.89 | 100 |
| 6.52 | 128 |
| 8.15 | 147 |

[a] The linear regression line for *k*obs vs [EtONa] has r = 0.998, intercept(*k*-1) = 30.5 s-1, slope(*k*1) = 14,500 M-1s-1 (See text).

Table S2. Summary of kinetic results for the slow process of the reaction of **1** with EtONa (**1 ↔ 2** → **3**) in anhydrous ethanol at 25.0±0.1˚C.[a]

| [EtONa] ,10-3 M | *k*obs ,10-3 s-1 |
| --- | --- |
| 1.61 | 0.401 |
| 3.19 | 0.599 |
| 6.51 | 0.813 |
| 15.9 | 1.05 |
| 26.0 | 1.2 |
| 39.0 | 1.30 |
| 52.1 | 1.32 |
| 65.1 | 1.37 |

[a ] The plot of *k*obs vs [EtONa] shows a saturation kinetic curve (See text).
